# Supplementary material for: Common gene expression strategies revealed by genome-wide analysis in yeast
Source: PubMed Central journal article supplement (PMC2246296; doi:10.1186/gb-2007-8-10-r222), 2007-10-19
Supplement: gb-2007-8-10-r222-S3.pdf [file gb-2007-8-10-r222-S3.pdf]

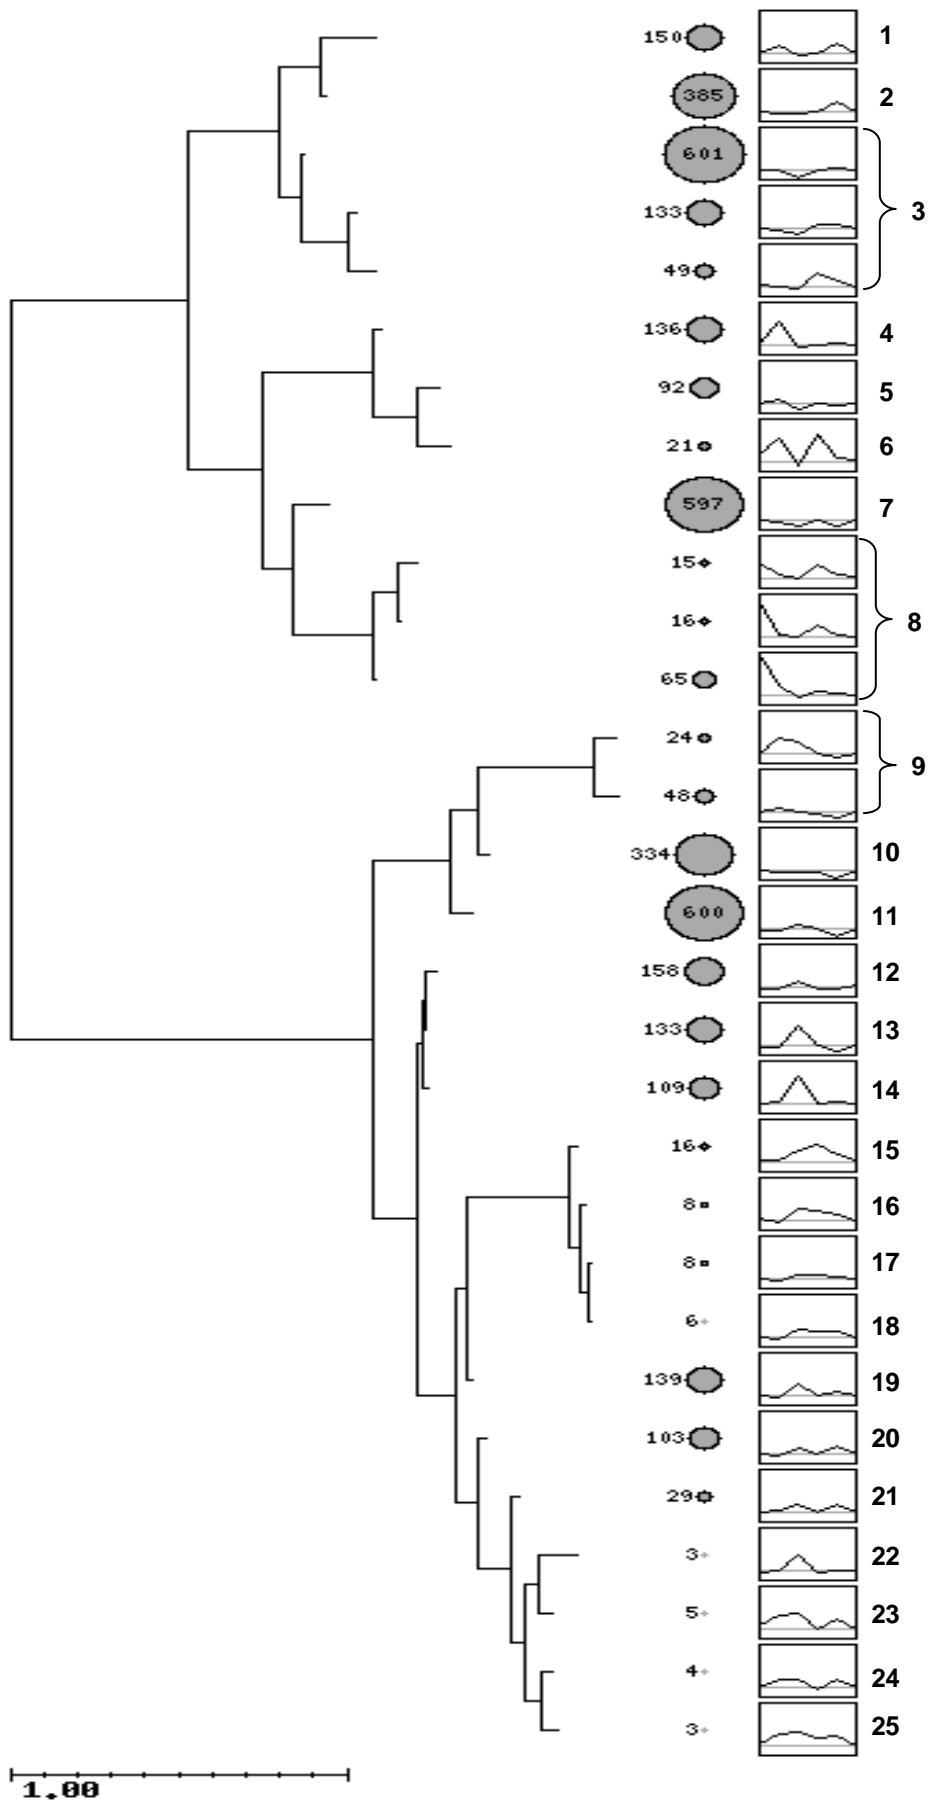

Figure S3
