# Supplementary material for: Common gene expression strategies revealed by genome-wide analysis in yeast
Source: PubMed Central journal article supplement (PMC2246296; doi:10.1186/gb-2007-8-10-r222), 2007-10-19
Supplement: gb-2007-8-10-r222-S8.pdf [file gb-2007-8-10-r222-S8.pdf]

**Table S1**

1. Total number of genes in Table S2 (with at least 1 data point for any variable):

**6173**

2. Total number of genes available for each variable, after dubious ORF filtering.

| RA          | TR          | RS          | PA          | TLRi        | TLR         | PS          |
|-------------|-------------|-------------|-------------|-------------|-------------|-------------|
| <b>6117</b> | <b>5669</b> | <b>4544</b> | <b>4239</b> | <b>5975</b> | <b>5968</b> | <b>3367</b> |

3. Total number of genes with at least 1 analysis (with data points for a minimum of 2 variables): **5968**

4. Number of genes considered in each variable pair-wise comparison (Spearman correlation and quintile analyses in Figure 2)

|      | RA          | TR          | RS          | PA          | TLRi        | TLR         | PS |
|------|-------------|-------------|-------------|-------------|-------------|-------------|----|
| RA   | -           |             |             |             |             |             |    |
| TR   | <b>5626</b> | -           |             |             |             |             |    |
| RS   | <b>4537</b> | <b>4272</b> | -           |             |             |             |    |
| PA   | <b>4215</b> | <b>4020</b> | <b>3311</b> | -           |             |             |    |
| TLRi | <b>5968</b> | <b>5590</b> | <b>4532</b> | <b>4192</b> | -           |             |    |
| TLR  | <i>NA</i>   | <b>5587</b> | <b>4527</b> | <b>4189</b> | <i>NA</i>   | -           |    |
| PS   | <b>3355</b> | <b>3207</b> | <b>2618</b> | <b>3125</b> | <b>3343</b> | <b>3341</b> | -  |

5. Total number of genes with values for at least 5 variables (used as z-scores values for cluster analysis in Figure 3): **3991**

6. Total number of genes with values for the 6 variables: **2338**

7. Number of genes belonging to MIPS complexes containing more than 2 proteins: **2264**. There are available data for **2252** genes.

8. Total number of genes analyzed in Gasch *et al.* [14] with data for fold-change in at least 1 experiment: **6152**. From them we have at least variable data point for **5978** genes.
