# Supplementary material for: Common gene expression strategies revealed by genome-wide analysis in yeast
Source: PubMed Central journal article supplement (PMC2246296; doi:10.1186/gb-2007-8-10-r222), 2007-10-19
Supplement: gb-2007-8-10-r222-S9.pdf [file gb-2007-8-10-r222-S9.pdf]

**Table S3**

| <b>ORF</b> | <b>Gene</b> |
|------------|-------------|
| YDL031W    | DBP10       |
| YDL213C    | NOP6        |
| YDR449C    | UTP6        |
| YER126C    | NSA2        |
| YGL078C    | DBP3        |
| YGL171W    | ROK1        |
| YGR095C    | RRP46       |
| YGR103W    | NOP7        |
| YGR128C    | UTP8        |
| YHR052W    | CIC1        |
| YHR197W    | RIX1        |
| YLL034C    | RIX7        |
| YLR222C    | UTP13       |
| YLR276C    | DBP9        |
| YMR049C    | ERB1        |
| YNL002C    | RLP7        |
| YNL061W    | NOP2        |
| YOR004W    | UTP23       |
| YOR056C    | NOB1        |
| YOR206W    | NOC2        |
| YOR272W    | YTM1        |
| YPL043W    | NOP4        |
| YPL266W    | DIM1        |
| YPR143W    | RRP15       |
