# Supplementary material for: Common gene expression strategies revealed by genome-wide analysis in yeast
Source: PubMed Central journal article supplement (PMC2246296; doi:10.1186/gb-2007-8-10-r222), 2007-10-19
Supplement: gb-2007-8-10-r222-S10.pdf [file gb-2007-8-10-r222-S10.pdf]

**Table S4****Cluster 2**  
(385)

| Rank | N   | X    | LOD   | P       | P-adj  | GO Attribute                                                                    |
|------|-----|------|-------|---------|--------|---------------------------------------------------------------------------------|
| 1    | 22  | 54   | 0.834 | 1.1e-09 | <0.001 | 0009100: glycoprotein metabolism                                                |
| 2    | 21  | 53   | 0.813 | 4.7e-09 | <0.001 | 0009101: glycoprotein biosynthesis                                              |
| 3    | 20  | 50   | 0.819 | 9.1e-09 | <0.001 | 0043413:                                                                        |
| 4    | 20  | 50   | 0.819 | 9.1e-09 | <0.001 | 0006486: protein amino acid glycosylation                                       |
| 5    | 15  | 33   | 0.910 | 8.9e-08 | <0.001 | 0006487: N-linked glycosylation                                                 |
| 6    | 181 | 1391 | 0.246 | 1.3e-07 | <0.001 | 0003824: catalytic activity/enzyme activity                                     |
| 7    | 53  | 295  | 0.350 | 2.9e-06 | 0.001  | 0005783: endoplasmic reticulum/ER                                               |
| 8    | 20  | 68   | 0.615 | 3.1e-06 | 0.001  | 0016757: transferase activity, transferring glycosyl groups/glycosyltransferase |
| 9    | 16  | 52   | 0.641 | 1.6e-05 | 0.008  | 0016758: transferase activity, transferring hexosyl groups/hexosyltransferase   |
| 10   | 12  | 32   | 0.768 | 2e-05   | 0.009  | 0000030: mannosyltransferase activity                                           |
| 11   | 30  | 152  | 0.388 | 8.3e-05 | 0.037  | 0044255: cellular lipid metabolism                                              |

**Cluster 3**  
(783)

| Rank | N   | X    | LOD   | P       | P-adj  | GO Attribute                                                                           |
|------|-----|------|-------|---------|--------|----------------------------------------------------------------------------------------|
| 1    | 86  | 163  | 0.699 | 5e-22   | <0.001 | 0007046: ribosome biogenesis                                                           |
| 2    | 93  | 194  | 0.617 | 6.1e-20 | <0.001 | 0007028: cytoplasm organization and biogenesis                                         |
| 3    | 93  | 194  | 0.617 | 6.1e-20 | <0.001 | 0042254: ribosome biogenesis and assembly                                              |
| 4    | 69  | 132  | 0.682 | 1.6e-17 | <0.001 | 0006364: rRNA processing                                                               |
| 5    | 69  | 140  | 0.630 | 9e-16   | <0.001 | 0016072: rRNA metabolism                                                               |
| 6    | 83  | 185  | 0.557 | 1.1e-15 | <0.001 | 0005730: nucleolus                                                                     |
| 7    | 121 | 361  | 0.354 | 4.3e-11 | <0.001 | 0016070: RNA metabolism                                                                |
| 8    | 30  | 50   | 0.799 | 3.2e-10 | <0.001 | 0006365: 35S primary transcript processing                                             |
| 9    | 88  | 255  | 0.363 | 5.5e-09 | <0.001 | 0006396: RNA processing                                                                |
| 10   | 13  | 15   | 1.351 | 4.2e-08 | <0.001 | 0042273: ribosomal large subunit biogenesis                                            |
| 11   | 63  | 172  | 0.396 | 8.1e-08 | <0.001 | 0006519: amino acid and derivative metabolism                                          |
| 12   | 19  | 29   | 0.890 | 8.3e-08 | <0.001 | 0003743: translation initiation factor activity                                        |
| 13   | 732 | 3525 | 0.321 | 1.2e-07 | <0.001 | 0005622: intracellular/protoplasm                                                      |
| 14   | 59  | 160  | 0.400 | 1.6e-07 | <0.001 | 0006520: amino acid metabolism                                                         |
| 15   | 22  | 39   | 0.731 | 3.6e-07 | <0.001 | 0006413: translational initiation/protein synthesis initiation                         |
| 16   | 64  | 184  | 0.361 | 5.7e-07 | 0.001  | 0009308: amine metabolism                                                              |
| 17   | 494 | 2206 | 0.173 | 5.9e-07 | 0.001  | 0044237: cellular metabolism                                                           |
| 18   | 176 | 658  | 0.215 | 7e-07   | 0.001  | 0043228: non-membrane-bound organelle                                                  |
| 19   | 176 | 658  | 0.215 | 7e-07   | 0.001  | 0043232: intracellular non-membrane-bound organelle                                    |
| 20   | 501 | 2245 | 0.172 | 7.1e-07 | 0.001  | 0008152: metabolism/metabolic process                                                  |
| 21   | 647 | 3042 | 0.205 | 1.2e-06 | 0.002  | 0050875: cellular physiological process/cell growth and/or maintenance/cell physiology |
| 22   | 759 | 3725 | 0.397 | 1.4e-06 | 0.002  | 0005623: cell                                                                          |
| 23   | 66  | 197  | 0.336 | 1.8e-06 | 0.002  | 0006807: nitrogen compound metabolism                                                  |
| 24   | 459 | 2047 | 0.159 | 3.1e-06 | 0.002  | 0044238: primary metabolism                                                            |
| 25   | 658 | 3120 | 0.199 | 4.5e-06 | 0.002  | 0007582: physiological process                                                         |
| 26   | 648 | 3064 | 0.194 | 4.7e-06 | 0.002  | 0009987: cellular process                                                              |
| 27   | 21  | 41   | 0.641 | 5.4e-06 | 0.002  | 0008135: translation factor activity                                                   |
| 28   | 19  | 36   | 0.667 | 8.7e-06 | 0.004  | 0009066: aspartate family amino acid metabolism                                        |
| 29   | 199 | 788  | 0.180 | 9.2e-06 | 0.004  | 0006996: organelle organization and biogenesis                                         |
| 30   | 8   | 9    | 1.369 | 1.6e-05 | 0.006  | 0000176: nuclear exosome (RNase complex)                                               |
| 31   | 23  | 51   | 0.537 | 2.9e-05 | 0.010  | 0045182: translation regulator activity                                                |
| 32   | 28  | 69   | 0.459 | 4.4e-05 | 0.016  | 0009451: RNA modification                                                              |
| 33   | 8   | 10   | 1.147 | 6.6e-05 | 0.027  | 0000178: exosome (RNase complex)                                                       |
| 34   | 25  | 60   | 0.477 | 6.7e-05 | 0.027  | 0008168: methyltransferase activity/methylase                                          |

|    |    |     |       |         |       |                                                               |
|----|----|-----|-------|---------|-------|---------------------------------------------------------------|
| 35 | 7  | 8   | 1.314 | 7.3e-05 | 0.032 | 0000177: cytoplasmic exosome (RNase complex)                  |
| 36 | 37 | 104 | 0.368 | 8.6e-05 | 0.032 | 0043037: translation/protein translation                      |
| 37 | 84 | 295 | 0.233 | 9.2e-05 | 0.034 | 0005783: endoplasmic reticulum/ER                             |
| 38 | 25 | 62  | 0.453 | 0.00013 | 0.046 | 0016741: transferase activity, transferring one-carbon groups |
| 39 | 35 | 99  | 0.363 | 0.00015 | 0.054 | 0044271: nitrogen compound biosynthesis                       |
| 40 | 35 | 99  | 0.363 | 0.00015 | 0.054 | 0009309: amine biosynthesis                                   |
| 41 | 70 | 240 | 0.245 | 0.00016 | 0.060 | 0019752: carboxylic acid metabolism                           |
| 42 | 70 | 240 | 0.245 | 0.00016 | 0.060 | 0006082: organic acid metabolism                              |
| 43 | 20 | 46  | 0.508 | 0.00018 | 0.065 | 0051082: unfolded protein binding                             |
| 44 | 19 | 43  | 0.520 | 0.0002  | 0.070 | 0000502: proteasome complex (sensu Eukaryota)/26S proteasome  |

**Cluster 4**  
(136)

| Rank | N   | X    | LOD   | P       | P-adj  | GO Attribute                                                                                     |
|------|-----|------|-------|---------|--------|--------------------------------------------------------------------------------------------------|
| 1    | 122 | 2838 | 0.548 | 1e-07   | <0.001 | 0043229: intracellular organelle                                                                 |
| 2    | 122 | 2838 | 0.548 | 1e-07   | <0.001 | 0043226: organelle                                                                               |
| 3    | 60  | 1020 | 0.377 | 1.4e-06 | <0.001 | 0043234: protein complex                                                                         |
| 4    | 22  | 214  | 0.572 | 2.2e-06 | <0.001 | 0005840: ribosome                                                                                |
| 5    | 9   | 40   | 0.956 | 5.3e-06 | <0.001 | 0015078: hydrogen ion transporter activity/proton transporter                                    |
| 6    | 9   | 42   | 0.929 | 8.2e-06 | <0.001 | 0015077: monovalent inorganic cation transporter activity/univalent inorganic cation transporter |
| 7    | 16  | 133  | 0.639 | 8.3e-06 | <0.001 | 0005759: mitochondrial matrix/mitochondrial stroma                                               |
| 8    | 8   | 33   | 0.997 | 1e-05   | 0.001  | 0006119: oxidative phosphorylation/respiratory-chain phosphorylation                             |
| 9    | 18  | 167  | 0.587 | 1e-05   | 0.002  | 0003735: structural constituent of ribosome/ribosomal protein                                    |
| 10   | 111 | 2593 | 0.382 | 1.2e-05 | 0.002  | 0043231: intracellular membrane-bound organelle                                                  |
| 11   | 111 | 2593 | 0.382 | 1.2e-05 | 0.002  | 0043227: membrane-bound organelle                                                                |
| 12   | 27  | 342  | 0.449 | 2.2e-05 | 0.007  | 0030529: ribonucleoprotein complex/RNP                                                           |
| 13   | 17  | 168  | 0.554 | 4.3e-05 | 0.016  | 0006091: generation of precursor metabolites and energy/energy pathways                          |
| 14   | 10  | 64   | 0.762 | 4.8e-05 | 0.016  | 0005761: mitochondrial ribosome                                                                  |
| 15   | 10  | 64   | 0.762 | 4.8e-05 | 0.016  | 0000313: organellar ribosome                                                                     |
| 16   | 6   | 21   | 1.091 | 5e-05   | 0.019  | 0005746: mitochondrial electron transport chain/respiratory chain                                |
| 17   | 12  | 97   | 0.646 | 9.1e-05 | 0.023  | 0015934: large ribosomal subunit                                                                 |
| 18   | 7   | 34   | 0.906 | 0.00011 | 0.034  | 0015399: primary active transporter activity                                                     |
| 19   | 21  | 256  | 0.456 | 0.00012 | 0.035  | 0005198: structural molecule activity                                                            |

**Cluster 6**  
(21)

| Rank | N  | X   | LOD   | P       | P-adj | GO Attribute                                                                                                         |
|------|----|-----|-------|---------|-------|----------------------------------------------------------------------------------------------------------------------|
| 1    | 12 | 626 | 0.856 | 1.5e-05 | 0.001 | 0044249: cellular biosynthesis                                                                                       |
| 2    | 8  | 256 | 0.974 | 2.5e-05 | 0.003 | 0005198: structural molecule activity                                                                                |
| 3    | 6  | 125 | 1.130 | 3.1e-05 | 0.007 | 0005830: cytosolic ribosome (sensu Eukaryota)/80S ribosome                                                           |
| 4    | 12 | 692 | 0.803 | 4.3e-05 | 0.011 | 0009058: biosynthesis/anabolism                                                                                      |
| 5    | 4  | 48  | 1.355 | 9.5e-05 | 0.044 | 0005843: cytosolic small ribosomal subunit (sensu Eukaryota)/40S ribosomal subunit/cytosolic small ribosomal subunit |
| 6    | 4  | 48  | 1.355 | 9.5e-05 | 0.044 | 0016283: eukaryotic 48S initiation complex                                                                           |

**Cluster 7**  
(597)

| Rank | N   | X   | LOD   | P       | P-adj  | GO Attribute                                          |
|------|-----|-----|-------|---------|--------|-------------------------------------------------------|
| 1    | 105 | 385 | 0.376 | 3.2e-11 | <0.001 | 0006350: transcription                                |
| 2    | 112 | 433 | 0.345 | 2.3e-10 | <0.001 | 0051244: regulation of cellular physiological process |

|    |     |      |       |         |        |                                                                                                                         |
|----|-----|------|-------|---------|--------|-------------------------------------------------------------------------------------------------------------------------|
| 3  | 115 | 449  | 0.340 | 2.4e-10 | <0.001 | 0050789: regulation of biological process/regulation                                                                    |
| 4  | 112 | 434  | 0.343 | 2.7e-10 | <0.001 | 0050794: regulation of cellular process                                                                                 |
| 5  | 114 | 445  | 0.340 | 2.9e-10 | <0.001 | 0050791: regulation of physiological process                                                                            |
| 6  | 213 | 1031 | 0.242 | 4.9e-09 | <0.001 | 0006139: nucleobase, nucleoside, nucleotide and nucleic acid metabolism                                                 |
| 7  | 93  | 357  | 0.341 | 7.3e-09 | <0.001 | 0006351: transcription, DNA-dependent                                                                                   |
| 8  | 57  | 186  | 0.428 | 2.1e-08 | <0.001 | 0000278: mitotic cell cycle                                                                                             |
| 9  | 74  | 270  | 0.364 | 3.2e-08 | <0.001 | 0019219: regulation of nucleobase, nucleoside, nucleotide and nucleic acid metabolism                                   |
| 10 | 71  | 256  | 0.370 | 3.7e-08 | <0.001 | 0045449: regulation of transcription                                                                                    |
| 11 | 74  | 279  | 0.344 | 1.4e-07 | <0.001 | 0007049: cell cycle/cell-division cycle                                                                                 |
| 12 | 80  | 310  | 0.329 | 1.5e-07 | <0.001 | 0031323: regulation of cellular metabolism                                                                              |
| 13 | 68  | 252  | 0.352 | 2.4e-07 | <0.001 | 0030528: transcription regulator activity                                                                               |
| 14 | 505 | 3064 | 0.249 | 3e-07   | <0.001 | 0009987: cellular process                                                                                               |
| 15 | 66  | 244  | 0.353 | 3.3e-07 | <0.001 | 0006355: regulation of transcription, DNA-dependent                                                                     |
| 16 | 45  | 144  | 0.435 | 3.7e-07 | <0.001 | 0006357: regulation of transcription from RNA polymerase II promoter/regulation of transcription from Pol II promoter   |
| 17 | 82  | 328  | 0.310 | 4.5e-07 | <0.001 | 0019222: regulation of metabolism                                                                                       |
| 18 | 60  | 222  | 0.350 | 1.2e-06 | 0.001  | 0006366: transcription from RNA polymerase II promoter/transcription from Pol II promoter                               |
| 19 | 499 | 3042 | 0.228 | 1.8e-06 | 0.001  | 0050875: cellular physiological process/cell growth and/or maintenance/cell physiology                                  |
| 20 | 36  | 111  | 0.456 | 2.2e-06 | 0.001  | 0000074: regulation of cell cycle/cell cycle control                                                                    |
| 21 | 48  | 170  | 0.372 | 4.1e-06 | 0.002  | 0000279: M phase/M-phase                                                                                                |
| 22 | 37  | 119  | 0.429 | 4.8e-06 | 0.002  | 0000087: M phase of mitotic cell cycle/M-phase of mitotic cell cycle                                                    |
| 23 | 36  | 117  | 0.422 | 8.4e-06 | 0.005  | 0007067: mitosis                                                                                                        |
| 24 | 506 | 3120 | 0.216 | 1e-05   | 0.005  | 0007582: physiological process                                                                                          |
| 25 | 94  | 421  | 0.244 | 1.3e-05 | 0.008  | 0043412:                                                                                                                |
| 26 | 80  | 344  | 0.265 | 1.3e-05 | 0.008  | 0006464: protein modification                                                                                           |
| 27 | 35  | 115  | 0.414 | 1.5e-05 | 0.008  | 0030427: site of polarized growth/site of polarized growth (sensu Fungi)/site of polarized growth (sensu Saccharomyces) |
| 28 | 17  | 40   | 0.635 | 2.3e-05 | 0.011  | 0007088: regulation of mitosis                                                                                          |
| 29 | 34  | 114  | 0.401 | 3.1e-05 | 0.016  | 0005933: bud                                                                                                            |
| 30 | 25  | 74   | 0.478 | 3.7e-05 | 0.016  | 0006468: protein amino acid phosphorylation                                                                             |
| 31 | 30  | 97   | 0.423 | 4.3e-05 | 0.017  | 0004672: protein kinase activity                                                                                        |
| 32 | 14  | 31   | 0.680 | 5.5e-05 | 0.021  | 0005937: mating projection/conjugation tube/shmoo tip                                                                   |
| 33 | 14  | 31   | 0.680 | 5.5e-05 | 0.021  | 0042995: cell projection                                                                                                |
| 34 | 62  | 263  | 0.267 | 9.1e-05 | 0.046  | 0007275: development                                                                                                    |
| 35 | 12  | 25   | 0.728 | 9.1e-05 | 0.047  | 0043332: mating projection tip/conjugation tube tip                                                                     |
| 36 | 20  | 56   | 0.514 | 9.1e-05 | 0.048  | 0004674: protein serine/threonine kinase activity                                                                       |
| 37 | 258 | 1447 | 0.149 | 9.3e-05 | 0.050  | 0005634: nucleus                                                                                                        |

## Cluster 8 (96)

| Rank | N  | X   | LOD   | P       | P-adj  | GO Attribute                                                                                                         |
|------|----|-----|-------|---------|--------|----------------------------------------------------------------------------------------------------------------------|
| 1    | 72 | 125 | 2.327 | 9e-98   | <0.001 | 0005830: cytosolic ribosome (sensu Eukaryota)/80S ribosome                                                           |
| 2    | 72 | 167 | 2.071 | 2.3e-85 | <0.001 | 0003735: structural constituent of ribosome/ribosomal protein                                                        |
| 3    | 74 | 214 | 1.947 | 1.4e-79 | <0.001 | 0005840: ribosome                                                                                                    |
| 4    | 72 | 256 | 1.774 | 3.5e-69 | <0.001 | 0005198: structural molecule activity                                                                                |
| 5    | 73 | 299 | 1.704 | 2.2e-65 | <0.001 | 0005829: cytosol                                                                                                     |
| 6    | 75 | 342 | 1.677 | 5.6e-64 | <0.001 | 0030529: ribonucleoprotein complex/RNP                                                                               |
| 7    | 76 | 377 | 1.648 | 3.8e-62 | <0.001 | 0006412: protein biosynthesis                                                                                        |
| 8    | 43 | 62  | 2.208 | 1.4e-59 | <0.001 | 0005842: cytosolic large ribosomal subunit (sensu Eukaryota)/60S ribosomal subunit/cytosolic large ribosomal subunit |
| 9    | 76 | 414 | 1.593 | 8.4e-59 | <0.001 | 0009059: macromolecule biosynthesis                                                                                  |

|    |    |      |       |         |        |                                                                                                                      |
|----|----|------|-------|---------|--------|----------------------------------------------------------------------------------------------------------------------|
| 10 | 43 | 97   | 1.758 | 1.5e-47 | <0.001 | 0015934: large ribosomal subunit                                                                                     |
| 11 | 78 | 626  | 1.413 | 2.5e-47 | <0.001 | 0044249: cellular biosynthesis                                                                                       |
| 12 | 78 | 692  | 1.355 | 7.3e-44 | <0.001 | 0009058: biosynthesis/anabolism                                                                                      |
| 13 | 74 | 658  | 1.273 | 2.8e-40 | <0.001 | 0043228: non-membrane-bound organelle                                                                                |
| 14 | 74 | 658  | 1.273 | 2.8e-40 | <0.001 | 0043232: intracellular non-membrane-bound organelle                                                                  |
| 15 | 29 | 48   | 1.938 | 9.7e-37 | <0.001 | 0005843: cytosolic small ribosomal subunit (sensu Eukaryota)/40S ribosomal subunit/cytosolic small ribosomal subunit |
| 16 | 29 | 48   | 1.938 | 9.7e-37 | <0.001 | 0016283: eukaryotic 48S initiation complex                                                                           |
| 17 | 77 | 892  | 1.176 | 4.2e-34 | <0.001 | 0019538: protein metabolism/protein metabolism and modification                                                      |
| 18 | 76 | 874  | 1.160 | 1.4e-33 | <0.001 | 0044267: cellular protein metabolism                                                                                 |
| 19 | 29 | 58   | 1.758 | 2.1e-33 | <0.001 | 0016282: eukaryotic 43S preinitiation complex/eukaryotic 43S pre-initiation complex                                  |
| 20 | 80 | 1020 | 1.185 | 3.4e-33 | <0.001 | 0043234: protein complex                                                                                             |
| 21 | 77 | 988  | 1.114 | 8.6e-31 | <0.001 | 0044260: cellular macromolecule metabolism                                                                           |
| 22 | 29 | 74   | 1.568 | 1.7e-29 | <0.001 | 0015935: small ribosomal subunit                                                                                     |
| 23 | 78 | 1065 | 1.096 | 1.8e-29 | <0.001 | 0043170: macromolecule metabolism                                                                                    |
| 24 | 83 | 2047 | 0.783 | 2.2e-13 | <0.001 | 0044238: primary metabolism                                                                                          |
| 25 | 85 | 2245 | 0.775 | 4.5e-12 | <0.001 | 0008152: metabolism/metabolic process                                                                                |
| 26 | 84 | 2206 | 0.751 | 7.5e-12 | <0.001 | 0044237: cellular metabolism                                                                                         |
| 27 | 88 | 2594 | 0.760 | 9.1e-10 | <0.001 | 0005737: cytoplasm                                                                                                   |
| 28 | 11 | 41   | 1.231 | 1.5e-09 | <0.001 | 0042257: ribosomal subunit assembly                                                                                  |
| 29 | 11 | 50   | 1.118 | 1.5e-08 | <0.001 | 0042255: ribosome assembly                                                                                           |
| 30 | 6  | 11   | 1.705 | 7e-08   | <0.001 | 0000028: ribosomal small subunit assembly and maintenance                                                            |
| 31 | 92 | 3042 | 0.817 | 1.5e-07 | <0.001 | 0050875: cellular physiological process/cell growth and/or maintenance/cell physiology                               |
| 32 | 92 | 3064 | 0.803 | 2.6e-07 | <0.001 | 0009987: cellular process                                                                                            |
| 33 | 92 | 3120 | 0.768 | 1.1e-06 | 0.001  | 0007582: physiological process                                                                                       |
| 34 | 87 | 2838 | 0.582 | 2.7e-06 | 0.001  | 0043229: intracellular organelle                                                                                     |
| 35 | 87 | 2838 | 0.582 | 2.7e-06 | 0.001  | 0043226: organelle                                                                                                   |
| 36 | 4  | 6    | 1.879 | 4.6e-06 | 0.002  | 0006450: regulation of translational fidelity/regulation of translational accuracy                                   |
| 37 | 11 | 108  | 0.719 | 4.4e-05 | 0.015  | 0006461: protein complex assembly/chaperone activity                                                                 |
| 38 | 15 | 194  | 0.595 | 4.7e-05 | 0.016  | 0007028: cytoplasm organization and biogenesis                                                                       |
| 39 | 15 | 194  | 0.595 | 4.7e-05 | 0.016  | 0042254: ribosome biogenesis and assembly                                                                            |

**Cluster 9**  
(72)

| Rank | N  | X    | LOD   | P       | P-adj | GO Attribute                        |
|------|----|------|-------|---------|-------|-------------------------------------|
| 1    | 39 | 1250 | 0.420 | 4.3e-05 | 0.015 | 0005554: molecular function unknown |

**Cluster 11**  
(600)

| Rank | N  | X   | LOD   | P       | P-adj | GO Attribute                                                                                  |
|------|----|-----|-------|---------|-------|-----------------------------------------------------------------------------------------------|
| 1    | 77 | 310 | 0.301 | 1.7e-06 | 0.001 | 0031323: regulation of cellular metabolism                                                    |
| 2    | 78 | 328 | 0.275 | 8.8e-06 | 0.003 | 0019222: regulation of metabolism                                                             |
| 3    | 80 | 342 | 0.265 | 1.3e-05 | 0.005 | 0006259: DNA metabolism                                                                       |
| 4    | 66 | 270 | 0.287 | 1.8e-05 | 0.007 | 0019219: regulation of nucleobase, nucleoside, nucleotide and nucleic acid metabolism         |
| 5    | 95 | 433 | 0.231 | 3.2e-05 | 0.009 | 0051244: regulation of cellular physiological process                                         |
| 6    | 95 | 434 | 0.230 | 3.5e-05 | 0.011 | 0050794: regulation of cellular process                                                       |
| 7    | 96 | 445 | 0.221 | 5.8e-05 | 0.016 | 0050791: regulation of physiological process                                                  |
| 8    | 26 | 80  | 0.450 | 6e-05   | 0.016 | 0007059: chromosome segregation/chromosome transmission                                       |
| 9    | 17 | 43  | 0.580 | 7.6e-05 | 0.030 | 0005083: small GTPase regulator activity/small GTPase regulatory/interacting protein activity |
| 10   | 96 | 449 | 0.215 | 8.4e-05 | 0.045 | 0050789: regulation of biological process/regulation                                          |

**Cluster 20**

(103)

| Rank | N | X | LOD   | P       | P-adj | GO Attribute                       |
|------|---|---|-------|---------|-------|------------------------------------|
| 1    | 3 | 4 | 1.955 | 6.6e-05 | 0.021 | 0004180: carboxypeptidase activity |

**Cluster 25**

(3)

| Rank | N | X  | LOD   | P       | P-adj | GO Attribute                |
|------|---|----|-------|---------|-------|-----------------------------|
| 1    | 2 | 48 | 2.150 | 0.00042 | 0.038 | 0006006: glucose metabolism |
| 2    | 2 | 61 | 2.041 | 0.00068 | 0.048 | 0019318: hexose metabolism  |

**Rank:** position in the attribute list ranked by significance of association with your query;

**N:** number of genes in your query with this attribute;

**X:** number of genes overall with this attribute;

**LOD:** the logarithm (base 10) of the odds ratio; positive and negative values indicate over- and under-representation, respectively;

**P:** single hypothesis one-sided P-value of the association between attribute and query (based on Fisher's Exact Test);

**P-adj:** adjusted P-value: fraction (as a %) of 1000 null-hypothesis simulations having attributes with this single-hypothesis P value or smaller
