# Supplementary material for: Common gene expression strategies revealed by genome-wide analysis in yeast
Source: PubMed Central journal article supplement (PMC2246296; doi:10.1186/gb-2007-8-10-r222), 2007-10-19
Supplement: gb-2007-8-10-r222-S11.pdf [file gb-2007-8-10-r222-S11.pdf]

Table S5

**Figure S2 (20 clusters)****Cluster 9 + 10**

(406)

| Rank | N   | X    | LOD   | P       | P-adj | GO Attribute                        |
|------|-----|------|-------|---------|-------|-------------------------------------|
| 1    | 163 | 1250 | 0.188 | 4.7e-05 | 0.017 | 0005554: molecular function unknown |

**Cluster 12 + 13 + 14**

(400)

| Rank | N | X | LOD   | P       | P-adj | GO Attribute                     |
|------|---|---|-------|---------|-------|----------------------------------|
| 1    | 5 | 6 | 1.522 | 5.5e-05 | 0.020 | 0005984: disaccharide metabolism |

**Cluster 17 + 18**

(14)

No significant GO categories were found.

**Cluster 24 + 25**

(7)

No significant GO categories were found.

**Figure S3 (25 clusters)****a) Included in Cluster 3 from Figure 3**

(601)

| Rank | N   | X    | LOD   | P       | P-adj  | GO Attribute                                                           |
|------|-----|------|-------|---------|--------|------------------------------------------------------------------------|
| 1    | 63  | 163  | 0.586 | 4.4e-14 | <0.001 | 0007046: ribosome biogenesis                                           |
| 2    | 68  | 194  | 0.520 | 1.1e-12 | <0.001 | 0007028: cytoplasm organization and biogenesis                         |
| 3    | 68  | 194  | 0.520 | 1.1e-12 | <0.001 | 0042254: ribosome biogenesis and assembly                              |
| 4    | 52  | 132  | 0.594 | 3.6e-12 | <0.001 | 0006364: rRNA processing                                               |
| 5    | 52  | 140  | 0.552 | 5.1e-11 | <0.001 | 0016072: rRNA metabolism                                               |
| 6    | 62  | 185  | 0.486 | 1e-10   | <0.001 | 0005730: nucleolus                                                     |
| 7    | 68  | 255  | 0.341 | 5e-07   | <0.001 | 0006396: RNA processing                                                |
| 8    | 22  | 50   | 0.660 | 7.9e-07 | 0.001  | 0006365: 35S primary transcript processing                             |
| 9    | 87  | 361  | 0.285 | 1.5e-06 | 0.001  | 0016070: RNA metabolism                                                |
| 10   | 8   | 9    | 1.510 | 2e-06   | 0.002  | 0000176: nuclear exosome (RNase complex)                               |
| 11   | 160 | 788  | 0.203 | 5.5e-06 | 0.003  | 0006996: organelle organization and biogenesis                         |
| 12   | 10  | 15   | 1.038 | 8.3e-06 | 0.003  | 0042273: ribosomal large subunit biogenesis                            |
| 13   | 8   | 10   | 1.288 | 8.7e-06 | 0.003  | 0000178: exosome (RNase complex)                                       |
| 14   | 561 | 3525 | 0.296 | 9.8e-06 | 0.004  | 0005622: intracellular/protoplasm                                      |
| 15   | 7   | 8    | 1.454 | 1.2e-05 | 0.004  | 0000177: cytoplasmic exosome (RNase complex)                           |
| 16   | 135 | 658  | 0.201 | 2.3e-05 | 0.005  | 0043228: non-membrane-bound organelle                                  |
| 17   | 135 | 658  | 0.201 | 2.3e-05 | 0.005  | 0043232: intracellular non-membrane-bound organelle                    |
| 18   | 9   | 14   | 0.994 | 3.7e-05 | 0.010  | 0000175: 3'-5'-exoribonuclease activity/3'-5' exoribonuclease activity |
| 19   | 172 | 886  | 0.177 | 3.9e-05 | 0.011  | 0016043: cell organization and biogenesis                              |
| 20   | 18  | 46   | 0.572 | 5.6e-05 | 0.020  | 0051082: unfolded protein binding                                      |
| 21   | 582 | 3725 | 0.364 | 5.7e-05 | 0.020  | 0005623: cell                                                          |

**b) Included in Cluster 3 from Figure 3**

(133)

| Rank | N  | X   | LOD   | P       | P-adj  | GO Attribute                                               |
|------|----|-----|-------|---------|--------|------------------------------------------------------------|
| 1    | 21 | 163 | 0.697 | 5.5e-08 | <0.001 | 0007046: ribosome biogenesis                               |
| 2    | 22 | 194 | 0.634 | 2.6e-07 | <0.001 | 0007028: cytoplasm organization and biogenesis             |
| 3    | 22 | 194 | 0.634 | 2.6e-07 | <0.001 | 0042254: ribosome biogenesis and assembly                  |
| 4    | 15 | 104 | 0.741 | 1.2e-06 | <0.001 | 0043037: translation/protein translation                   |
| 5    | 15 | 132 | 0.619 | 2.5e-05 | 0.008  | 0006364: rRNA processing                                   |
| 6    | 18 | 185 | 0.547 | 3.2e-05 | 0.009  | 0005730: nucleolus                                         |
| 7    | 7  | 29  | 1.004 | 3.3e-05 | 0.009  | 0003743: translation initiation factor activity            |
| 8    | 27 | 361 | 0.434 | 3.9e-05 | 0.014  | 0016070: RNA metabolism                                    |
| 9    | 8  | 41  | 0.888 | 4.7e-05 | 0.019  | 0008135: translation factor activity, nucleic acid binding |
| 10   | 15 | 140 | 0.590 | 5e-05   | 0.019  | 0016072: rRNA metabolism                                   |
| 11   | 16 | 160 | 0.557 | 6.5e-05 | 0.023  | 0006520: amino acid metabolism                             |
| 12   | 18 | 197 | 0.516 | 7.3e-05 | 0.027  | 0006807: nitrogen compound metabolism                      |
| 13   | 10 | 69  | 0.734 | 7.7e-05 | 0.031  | 0009451: RNA modification                                  |

**c) Included in Cluster 3 from Figure 3**

(49)

| Rank | N  | X    | LOD   | P       | P-adj  | GO Attribute                                         |
|------|----|------|-------|---------|--------|------------------------------------------------------|
| 1    | 18 | 240  | 0.992 | 1.2e-10 | <0.001 | 0019752: carboxylic acid metabolism                  |
| 2    | 18 | 240  | 0.992 | 1.2e-10 | <0.001 | 0006082: organic acid metabolism                     |
| 3    | 13 | 160  | 0.978 | 3.2e-08 | <0.001 | 0006520: amino acid metabolism                       |
| 4    | 13 | 172  | 0.943 | 7.7e-08 | <0.001 | 0006519: amino acid and derivative metabolism        |
| 5    | 13 | 184  | 0.910 | 1.7e-07 | <0.001 | 0009308: amine metabolism                            |
| 6    | 13 | 197  | 0.877 | 3.8e-07 | <0.001 | 0006807: nitrogen compound metabolism                |
| 7    | 6  | 36   | 1.282 | 3.7e-06 | 0.002  | 0009066: aspartate family amino acid metabolism      |
| 8    | 40 | 2047 | 0.613 | 9.5e-06 | 0.008  | 0044238: primary metabolism                          |
| 9    | 21 | 692  | 0.565 | 2.4e-05 | 0.012  | 0009058: biosynthesis/anabolism                      |
| 10   | 4  | 15   | 1.529 | 2.5e-05 | 0.013  | 0009081: branched chain family amino acid metabolism |
| 11   | 44 | 2594 | 0.644 | 6.9e-05 | 0.024  | 0005737: cytoplasm                                   |
| 12   | 48 | 3120 | 0.960 | 8.3e-05 | 0.025  | 0007582: physiological process                       |
| 13   | 40 | 2206 | 0.543 | 9.4e-05 | 0.028  | 0044237: cellular metabolism                         |

**d) Included in Cluster 8 from Figure 3**

(15)

| Rank | N  | X    | LOD   | P       | P-adj  | GO Attribute                                                                                                         |
|------|----|------|-------|---------|--------|----------------------------------------------------------------------------------------------------------------------|
| 1    | 8  | 125  | 1.570 | 4e-09   | <0.001 | 0005830: cytosolic ribosome (sensu Eukaryota)/80S ribosome                                                           |
| 2    | 8  | 167  | 1.433 | 4e-08   | <0.001 | 0003735: structural constituent of ribosome/ribosomal protein                                                        |
| 3    | 6  | 62   | 1.676 | 5e-08   | <0.001 | 0005842: cytosolic large ribosomal subunit (sensu Eukaryota)/60S ribosomal subunit/cytosolic large ribosomal subunit |
| 4    | 8  | 214  | 1.315 | 2.8e-07 | <0.001 | 0005840: ribosome                                                                                                    |
| 5    | 9  | 342  | 1.203 | 7.1e-07 | <0.001 | 0030529: ribonucleoprotein complex/RNP                                                                               |
| 6    | 6  | 97   | 1.463 | 7.4e-07 | <0.001 | 0015934: large ribosomal subunit                                                                                     |
| 7    | 11 | 626  | 1.144 | 9.8e-07 | <0.001 | 0044249: cellular biosynthesis                                                                                       |
| 8    | 8  | 256  | 1.230 | 1.1e-06 | <0.001 | 0005198: structural molecule activity                                                                                |
| 9    | 9  | 377  | 1.155 | 1.6e-06 | <0.001 | 0006412: protein biosynthesis                                                                                        |
| 10   | 11 | 692  | 1.091 | 2.8e-06 | <0.001 | 0009058: biosynthesis/anabolism                                                                                      |
| 11   | 9  | 414  | 1.109 | 3.7e-06 | <0.001 | 0009059: macromolecule biosynthesis                                                                                  |
| 12   | 8  | 299  | 1.156 | 3.7e-06 | <0.001 | 0005829: cytosol                                                                                                     |
| 13   | 12 | 1020 | 1.021 | 1.5e-05 | 0.009  | 0043234: protein complex                                                                                             |

**e) Included in Cluster 8 from Figure 3**

(16)

| Rank | N  | X    | LOD   | P       | P-adj  | GO Attribute                                                                                                         |
|------|----|------|-------|---------|--------|----------------------------------------------------------------------------------------------------------------------|
| 1    | 13 | 214  | 1.858 | 1e-14   | <0.001 | 0005840: ribosome                                                                                                    |
| 2    | 11 | 125  | 1.848 | 7.1e-14 | <0.001 | 0005830: cytosolic ribosome (sensu Eukaryota)/80S ribosome                                                           |
| 3    | 11 | 167  | 1.707 | 1.8e-12 | <0.001 | 0003735: structural constituent of ribosome/ribosomal protein                                                        |
| 4    | 13 | 342  | 1.630 | 4.9e-12 | <0.001 | 0030529: ribonucleoprotein complex/RNP                                                                               |
| 5    | 13 | 377  | 1.582 | 1.7e-11 | <0.001 | 0006412: protein biosynthesis                                                                                        |
| 6    | 13 | 414  | 1.535 | 5.7e-11 | <0.001 | 0009059: macromolecule biosynthesis                                                                                  |
| 7    | 11 | 256  | 1.502 | 2e-10   | <0.001 | 0005198: structural molecule activity                                                                                |
| 8    | 11 | 299  | 1.426 | 1.1e-09 | <0.001 | 0005829: cytosol                                                                                                     |
| 9    | 13 | 626  | 1.325 | 1.1e-08 | <0.001 | 0044249: cellular biosynthesis                                                                                       |
| 10   | 6  | 48   | 1.758 | 1.6e-08 | <0.001 | 0005843: cytosolic small ribosomal subunit (sensu Eukaryota)/40S ribosomal subunit/cytosolic small ribosomal subunit |
| 11   | 6  | 48   | 1.758 | 1.6e-08 | <0.001 | 0016283: eukaryotic 48S initiation complex                                                                           |
| 12   | 13 | 658  | 1.298 | 2.1e-08 | <0.001 | 0043228: non-membrane-bound organelle                                                                                |
| 13   | 13 | 658  | 1.298 | 2.1e-08 | <0.001 | 0043232: intracellular non-membrane-bound organelle                                                                  |
| 14   | 13 | 692  | 1.272 | 3.9e-08 | <0.001 | 0009058: biosynthesis/anabolism                                                                                      |
| 15   | 6  | 58   | 1.665 | 5.2e-08 | <0.001 | 0016282: eukaryotic 43S preinitiation complex/eukaryotic 43S pre-initiation complex                                  |
| 16   | 6  | 74   | 1.547 | 2.3e-07 | <0.001 | 0015935: small ribosomal subunit                                                                                     |
| 17   | 13 | 874  | 1.144 | 7.2e-07 | <0.001 | 0044267: cellular protein metabolism                                                                                 |
| 18   | 13 | 892  | 1.132 | 9.2e-07 | <0.001 | 0019538: protein metabolism/protein metabolism and modification                                                      |
| 19   | 5  | 62   | 1.513 | 3e-06   | <0.001 | 0005842: cytosolic large ribosomal subunit (sensu Eukaryota)/60S ribosomal subunit/cytosolic large ribosomal subunit |
| 20   | 13 | 988  | 1.074 | 3.2e-06 | <0.001 | 0044260: cellular macromolecule metabolism                                                                           |
| 21   | 13 | 1020 | 1.055 | 4.8e-06 | <0.001 | 0043234: protein complex                                                                                             |
| 22   | 13 | 1065 | 1.029 | 8e-06   | <0.001 | 0043170: macromolecule metabolism                                                                                    |
| 23   | 5  | 97   | 1.302 | 2.7e-05 | 0.008  | 0015934: large ribosomal subunit                                                                                     |

**f) Included in Cluster 8 from Figure 3**

(65)

| Rank | N  | X   | LOD   | P       | P-adj  | GO Attribute                                                                                                         |
|------|----|-----|-------|---------|--------|----------------------------------------------------------------------------------------------------------------------|
| 1    | 53 | 125 | 2.357 | 2.1e-73 | <0.001 | 0005830: cytosolic ribosome (sensu Eukaryota)/80S ribosome                                                           |
| 2    | 53 | 167 | 2.153 | 3.5e-65 | <0.001 | 0003735: structural constituent of ribosome/ribosomal protein                                                        |
| 3    | 53 | 214 | 1.999 | 1.4e-58 | <0.001 | 0005840: ribosome                                                                                                    |
| 4    | 53 | 256 | 1.893 | 5.9e-54 | <0.001 | 0005198: structural molecule activity                                                                                |
| 5    | 54 | 299 | 1.851 | 7e-52   | <0.001 | 0005829: cytosol                                                                                                     |
| 6    | 53 | 342 | 1.730 | 9.7e-47 | <0.001 | 0030529: ribonucleoprotein complex/RNP                                                                               |
| 7    | 54 | 377 | 1.722 | 4.6e-46 | <0.001 | 0006412: protein biosynthesis                                                                                        |
| 8    | 32 | 62  | 2.093 | 2.3e-44 | <0.001 | 0005842: cytosolic large ribosomal subunit (sensu Eukaryota)/60S ribosomal subunit/cytosolic large ribosomal subunit |
| 9    | 54 | 414 | 1.671 | 9.4e-44 | <0.001 | 0009059: macromolecule biosynthesis                                                                                  |
| 10   | 32 | 97  | 1.757 | 1.7e-36 | <0.001 | 0015934: large ribosomal subunit                                                                                     |
| 11   | 54 | 626 | 1.443 | 8.5e-34 | <0.001 | 0044249: cellular biosynthesis                                                                                       |
| 12   | 54 | 692 | 1.387 | 1.9e-31 | <0.001 | 0009058: biosynthesis/anabolism                                                                                      |
| 13   | 53 | 658 | 1.370 | 3.2e-31 | <0.001 | 0043228: non-membrane-bound organelle                                                                                |
| 14   | 53 | 658 | 1.370 | 3.2e-31 | <0.001 | 0043232: intracellular non-membrane-bound organelle                                                                  |
| 15   | 21 | 48  | 1.835 | 1.3e-26 | <0.001 | 0005843: cytosolic small ribosomal subunit (sensu Eukaryota)/40S ribosomal subunit/cytosolic small ribosomal subunit |
| 16   | 21 | 48  | 1.835 | 1.3e-26 | <0.001 | 0016283: eukaryotic 48S initiation complex                                                                           |

|    |    |      |       |         |        |                                                                                        |
|----|----|------|-------|---------|--------|----------------------------------------------------------------------------------------|
| 17 | 54 | 874  | 1.253 | 4.9e-26 | <0.001 | 0044267: cellular protein metabolism                                                   |
| 18 | 54 | 892  | 1.241 | 1.4e-25 | <0.001 | 0019538: protein metabolism/protein metabolism and modification                        |
| 19 | 21 | 58   | 1.699 | 1.8e-24 | <0.001 | 0016282: eukaryotic 43S preinitiation complex/eukaryotic 43S pre-initiation complex    |
| 20 | 55 | 988  | 1.229 | 1.9e-24 | <0.001 | 0044260: cellular macromolecule metabolism                                             |
| 21 | 55 | 1020 | 1.209 | 1e-23   | <0.001 | 0043234: protein complex                                                               |
| 22 | 55 | 1065 | 1.183 | 1e-22   | <0.001 | 0043170: macromolecule metabolism                                                      |
| 23 | 21 | 74   | 1.543 | 6.8e-22 | <0.001 | 0015935: small ribosomal subunit                                                       |
| 24 | 10 | 41   | 1.369 | 4.9e-10 | <0.001 | 0042257: ribosomal subunit assembly                                                    |
| 25 | 10 | 50   | 1.259 | 4e-09   | <0.001 | 0042255: ribosome assembly                                                             |
| 26 | 6  | 11   | 1.891 | 6.4e-09 | <0.001 | 0000028: ribosomal small subunit assembly and maintenance                              |
| 27 | 55 | 2047 | 0.709 | 1.5e-08 | <0.001 | 0044238: primary metabolism                                                            |
| 28 | 56 | 2206 | 0.690 | 9.2e-08 | <0.001 | 0044237: cellular metabolism                                                           |
| 29 | 56 | 2245 | 0.673 | 2.1e-07 | <0.001 | 0008152: metabolism/metabolic process                                                  |
| 30 | 60 | 2594 | 0.780 | 2.7e-07 | <0.001 | 0005737: cytoplasm                                                                     |
| 31 | 4  | 6    | 2.060 | 9.4e-07 | 0.001  | 0006450: regulation of translational fidelity/regulation of translational accuracy     |
| 32 | 14 | 194  | 0.766 | 1.8e-06 | 0.001  | 0007028: cytoplasm organization and biogenesis                                         |
| 33 | 14 | 194  | 0.766 | 1.8e-06 | 0.001  | 0042254: ribosome biogenesis and assembly                                              |
| 34 | 10 | 108  | 0.866 | 7.2e-06 | 0.002  | 0006461: protein complex assembly/chaperone activity                                   |
| 35 | 62 | 3042 | 0.752 | 3.2e-05 | 0.014  | 0050875: cellular physiological process/cell growth and/or maintenance/cell physiology |
| 36 | 62 | 3064 | 0.738 | 4.7e-05 | 0.020  | 0009987: cellular process                                                              |
| 37 | 5  | 26   | 1.217 | 5e-05   | 0.020  | 0006417: regulation of protein biosynthesis                                            |
| 38 | 5  | 26   | 1.217 | 5e-05   | 0.020  | 0006445: regulation of translation                                                     |
| 39 | 59 | 2838 | 0.576 | 0.00011 | 0.039  | 0043229: intracellular organelle                                                       |
| 40 | 59 | 2838 | 0.576 | 0.00011 | 0.039  | 0043226: organelle                                                                     |
| 41 | 62 | 3120 | 0.703 | 0.00012 | 0.040  | 0007582: physiological process                                                         |

**g) Included in Cluster 9 from Figure 3**  
(24)

No significant GO categories were found.

**h) Included in Cluster 9 from Figure 3**  
(48)

No significant GO categories were found.
