# Supplementary material for: Common gene expression strategies revealed by genome-wide analysis in yeast
Source: PubMed Central journal article supplement (PMC2246296; doi:10.1186/gb-2007-8-10-r222), 2007-10-19
Supplement: gb-2007-8-10-r222-S12.pdf [file gb-2007-8-10-r222-S12.pdf]

Table S6

| Group                  | Sub-group                    | n   | aSEe   | aSEr   |
|------------------------|------------------------------|-----|--------|--------|
| Nucleosome             |                              | 8   | 0.0242 | 0.1019 |
| TOM-TIM                |                              | 16  | 0.0604 | 0.0793 |
| Respiratory complexes  | COX                          | 9   | 0.0865 | 0.0987 |
|                        | Cit b/c                      | 9   | 0.0724 | 0.0904 |
|                        | ATP synthase                 | 17  | 0.0478 | 0.0763 |
| Cytosolic ribosome     |                              | 137 | 0.0102 | 0.0249 |
| Proteasome             | 20S                          | 14  | 0.0313 | 0.0820 |
|                        | 19S                          | 19  | 0.0456 | 0.0653 |
| RNA polymerases        |                              | 23  | 0.0473 | 0.0626 |
| SAGA                   |                              | 17  | 0.0608 | 0.0694 |
| 90S Processosome       |                              | 52  | 0.0281 | 0.0404 |
| Nuclear pore           |                              | 48  | 0.0356 | 0.0416 |
| Mitochondrial ribosome |                              | 67  | 0.0271 | 0.0362 |
| Exosome                |                              | 14  | 0.0475 | 0.0782 |
| Spliceosome            |                              | 30  | 0.0403 | 0.0573 |
| APC                    |                              | 16  | 0.0729 | 0.0773 |
| Energy pathways        | Glycolysis & Gluconeogenesis | 41  | 0.0479 | 0.0458 |
|                        | TCA                          | 31  | 0.0506 | 0.0535 |
|                        | Fermentation                 | 33  | 0.0576 | 0.0562 |
| Vacuole                |                              | 18  | 0.0614 | 0.0707 |
| Transcription factors  |                              | 145 | 0.0225 | 0.0247 |
| Replication complexes  |                              | 175 | 0.0359 | 0.0416 |
| Mitosis                |                              | 145 | 0.0237 | 0.0241 |
